# Supplementary material for: Adaptative cellular and metabolomic responses to salinity of black yeasts isolated from deep-sea sediments of the Gulf of Mexico
Source: Research Square preprint supplement (doi:10.21203/rs.3.rs-7032826/v1), 2025-07-21
Supplement: Supplementary file 1 [file 9a56166fe2302e794b079d7a.docx]

**Extract preparation for metabolomic analysis**

To obtain the metabolome of black yeasts, extracts were prepared from both the biomass and the liquid medium. After 21 days, cellular metabolism was inactivated by adding 10% methanol (MeOH) to the culture and allowing it to rest for at least 30 minutes. To separate the biomass from the liquid medium, the mixture was centrifuged at 8000 x g for 30 minutes at 25°C using a Beckman Coulter Avanti JXN-26 centrifuge with rotor JA14. Additionally, the supernatant was filtered through Whatman #1 paper.

The collected biomass was placed in a flask, and a 1:1 ratio of chloroform-methanol (CHCl₃:MeOH) was added. The mixture was stirred at 110 rpm for 24 hours. The biomass was then filtered (using Whatman #1 paper), and the solvent was recovered in a distillation flask, which was subsequently placed in a rotary evaporator (Buchi® Rotavapor® R-3) until the extract was obtained. This extract was transferred to a vial of known weight and dried using air. This procedure was performed twice, and the corresponding extracts were combined in the same vial to calculate the yield. Following this, a second extraction was carried out by adding a 1:1 ratio of methanol:water (MeOH:H₂O) as the solvent, and the same procedure described above was repeated.

To obtain metabolic extracts from the supernatant, 20 g.L⁻¹ of XAD16N resin (Amberlite® CAS-9003-69-4) was used, which adsorbs and releases ionic species through both hydrophobic and polar interactions. The supernatant containing the resin (previously washed and dried) was agitated for 24 hours, followed by vacuum filtration, which separated the liquid medium from the resin. The liquid medium was stored, while the resin (completely dried) was transferred to a flask containing 50 mL of ethyl acetate (AcEt) and agitated for 30 minutes. The resin was then filtered (using Whatman #1 paper), the solvent was collected, and the procedure described in the previous paragraph was followed until the total extract was obtained. After filtration and complete drying, the resin was transferred to a flask containing 50 mL of MeOH, and the same procedure as with AcEt was repeated until the total MeOH extract was obtained. The resin was then returned to the stored supernatant, and the entire extraction process with both solvents was repeated one more time.

**Metabolomics data processing**

Initially, vendor data files derived from LC-MS/MS in .RAW extension were converted to .mzML format using the MSConvert tool through ProteoWizard version (PMID: 23051804). These generated files were processed in MZmine 3.9 (Schmid et al., 2023). Processing steps included mass detection, chromatogram building, deconvolution, isotope grouping, alignment, row filter, gap-filling, and blank filtering.

For mass detection, the noise level was set to 4.0E4 for MS level 1 and 1.0E2 for MS level 2. ADAP chromatogram builder was used with a minimum group size of scans of 4, a group intensity threshold of 4.0E4, a minimum highest intensity of 1.0E5, and an m/z tolerance of 0.001 or 5.0 ppm. Chromatogram deconvolution was performed using the ADAP Chromatogram Deconvolution Module with the following settings: S/N threshold 5, minimum feature height 1.0E5, coefficient of variation threshold for the peak top position 0 %, retention time range for identification 0 to 0.6 min, RT wavelet range 0.0 to 0.02 min. Isotopic peak grouper was used to group the isotopic peaks with an m/z tolerance of 0.001 or 3.0 ppm and RT tolerance of 0.02. Isotopic peak finder was used with m/z tolerance of 0.001 or 5.0 ppm and maximum charge of 2. Join aligner was used for alignment with a m/z tolerance of 0.001 or 5.0 ppm, weight for m/z 3, retention time tolerance of 0.06 min, and weight for RT 1. Feature list rows filter was performed using m/z tolerance of 0.0005 or 5.0 ppm, max charge of 1, and exclude isotopes O. Gap filling was performed using Peak Finder module with an intensity tolerance of 20 %, m/z tolerance of 0.002 or 5.0 ppm, and RT tolerance of 0.01 min. Duplicate peak filter was performed using m/z tolerance of 0.0005 or 2.0 ppm and RT tolerance of 0.02 min. Next, the peaks detected in blank samples were removed using the blank filter module to remove the peaks present in blank samples and were not considered for analysis. Finally, the results were exported to GNPS for FBMN analysis. The data was filtered by removing all MS/MS fragment ions within +/- 17 Da of the precursor m/z. MS/MS spectra were window filtered by choosing only the top 6 fragment ions in the +/- 50 Da window throughout the spectrum. The precursor ion mass tolerance was set to 0.01 Da, and the MS/MS fragment ion tolerance to 0.02 Da. A molecular network was then created where edges were filtered to have a cosine score above 0.7 and more than 4 matched (Hernández-Melgar et al., 2024) peaks. Furthermore, edges between two nodes were kept in the network if and only if each node appeared in the other's respective top 10 most similar nodes. Finally, the maximum size of a molecular family was set to 100, and the lowest-scoring edges were removed from molecular families until the molecular family size was below this threshold. The spectra in the network were then searched against GNPS spectral libraries (Wang, 2016; Horai, 2010). The library spectra were filtered in the same manner as the input data. All matches kept between network spectra and library spectra were required to have a score above 0.7 and at least six matched peaks. The molecular networks were visualized using Cytoscape software (Shannon et al., 2003).

DEREPLICATOR+ (PMID: 30279420) and MolDiscovery (PMID: 34140479) were used to annotate MS/MS spectra with the following parameters for both tools: a precursor and fragment ion mass tolerance of 0.02 Da; maximum charge, 1; and predefined database, AllDB, consisting of 720K compounds. Additionally, the .mgf file derived from MZmine analysis was analyzed by SIRIUS software GUI (version 5.8.5) (PMID: 30886413) to obtain the chemical formula (https://doi.org/10.1038/s42256-020-00234-6), molecular structure (PMID: 26392543, 34650271), and chemical class assignment (PMID: 34662515, 33230292).

Potential contaminants and annotations with mass errors exceeding 5 ppm were excluded from the analysis. The putative identifications obtained through GNPS spectral matching and in-silico tools are classified as level 2 and 3, respectively, according to the Metabolomics Standards Initiative guidelines (PMID:24039616). Some of the predicted metabolite annotations derived from in-silico dereplication tools lacked precise chemical names or only provided the SMILES string representation of the molecular structure. To address this limitation, we leveraged a SMILES-to-IUPAC (STOUT) name translator to retrieve the corresponding IUPAC names (PMID: 33906675).

Most of the procedures were executed using R software version 4.3 and RStudio version 2023.06.0. Tables encompassing molecular information were generated using the MetaboCoreUtils (PMID: 35208247), chemif (REF: Finch J (2023). cheminf: Chemoinformatics Tools For Annotating Untargeted ESI-MS Metabolomics Data. R package version 0.1.0, https://jasenfinch.github.io/cheminf/), and ChemmineR (PMID: 18596077). For data manipulation, the dplyr (REF: Wickham H, François R, Henry L, Müller K, Vaughan D (2023). dplyr: A Grammar of Data Manipulation. R package version 1.1.4, https://github.com/tidyverse/dplyr, https://dplyr.tidyverse.org) and data.table (REF: Barrett T, Dowle M, Srinivasan A, Gorecki J, Chirico M, Hocking T (2024). data.table: Extension of 'data.frame'. R package version 1.14.99, https://Rdatatable.gitlab.io/data.table, https://github.com/Rdatatable/data.table, https://r-datatable.com) libraries were utilized.
