# Supplementary material for: Adaptative cellular and metabolomic responses to salinity of black yeasts isolated from deep-sea sediments of the Gulf of Mexico
Source: Research Square preprint supplement (doi:10.21203/rs.3.rs-7032826/v1), 2025-07-21
Supplement: Supplementary file 2 [file bd8a11ab034cff893474f079.docx]

**Parameters for feature-based molecular networking and spectral matching, Moldiscovery and Dereplicator using all data sets are available in the following links.**

***Salinomyces thailandicus***

Sth_0_MeOH_P6_Ajustado_2024 07 30

<https://gnps.ucsd.edu/ProteoSAFe/status.jsp?task=b513f589d64c47129e9a31e660bfe46f>

Sth_10%_MeOH_P6_Ajustado_2024 08 03

<https://gnps.ucsd.edu/ProteoSAFe/status.jsp?task=5d7baa288d4f422caa8e0c83ed56db92>

Sth_0_PHT_MeOH_P6_Ajustado_2024 08 03

<https://gnps.ucsd.edu/ProteoSAFe/status.jsp?task=d7b5054a8c904e1d8be694ad442f39fb>

Sth_10%_PHT_MeOH_P6_Ajustado_2024 08 03

<https://gnps.ucsd.edu/ProteoSAFe/status.jsp?task=08f4a071cf2f4285b1fa6a49680f08e6>

Sth_0_MeOH_moldiscovery

<https://gnps.ucsd.edu/ProteoSAFe/status.jsp?task=8ec53d69a82d42929e388f32d753ee99>

Sth_10%_MeOH_moldiscovery

<https://gnps.ucsd.edu/ProteoSAFe/status.jsp?task=6e696f7875484086982acebef8e9b7ad>

Sth_0_PHT_MeOH_moldiscovery

<https://gnps.ucsd.edu/ProteoSAFe/status.jsp?task=1d5b0864842f4e8a8d26a19bb0e713bb>

Sth_10%_PHT_MeOH_moldiscovery <https://gnps.ucsd.edu/ProteoSAFe/status.jsp?task=6f8a9c3a86104162a17523aa7bd7eba7>

Sth_0_MeOH_dereplicator

<https://gnps.ucsd.edu/ProteoSAFe/status.jsp?task=02521c5aeef34c65a51fb22c1d422a63>

Sth_10%_MeOH_dereplicator

<https://gnps.ucsd.edu/ProteoSAFe/status.jsp?task=32e6250689644642be7720c9bb4e0c26>

Sth_0_PHT_MeOH_dereplicator

<https://gnps.ucsd.edu/ProteoSAFe/status.jsp?task=9aff9e07bbd341b8907a611107702c35>

Sth_10%_PHT_MeOH_dereplicator

<https://gnps.ucsd.edu/ProteoSAFe/status.jsp?task=0be098b08f474dd0b985639b6f2c9389>

***N. triangularis***

Ntr_0_MeOH_P6_Ajustado_2024 07 29

<https://gnps.ucsd.edu/ProteoSAFe/status.jsp?task=780f2cb1676342599b4c37872e10ee09>

Ntr_10%_MeOH_P6 Ajustado_2024 07 30

<https://gnps.ucsd.edu/ProteoSAFe/status.jsp?task=b2e1b90a5dac41f4a08343861b750e70>

Ntr_0_PHT_MeOH_P6 Ajustado_2024 07 30

<https://gnps.ucsd.edu/ProteoSAFe/status.jsp?task=df6a26c8184049bb897e004a7d114450>

Ntr_10%_PHT_MeOH_P6 Ajustado_2024 07 30

<https://gnps.ucsd.edu/ProteoSAFe/status.jsp?task=c09ecbed8415417e8b9c53032c6e3ccc>

Ntr_0_MeOH_moldiscovery

<https://gnps.ucsd.edu/ProteoSAFe/status.jsp?task=d7c32280b9754dfaaa0a14bcea58ab96>

Ntr_10%_MeOH_moldiscovery

<https://gnps.ucsd.edu/ProteoSAFe/status.jsp?task=95c40bc160ec4460a51bf057151cbb8b>

Ntr_0_PHT_MeOH_moldiscovery

<https://gnps.ucsd.edu/ProteoSAFe/status.jsp?task=a5f0972866a14d74b67762f5fa99d0fe>

Ntr_10%_PHT_MeOH_moldiscovery

<https://gnps.ucsd.edu/ProteoSAFe/status.jsp?task=5ccecb1b18a94dd2b8a2eeb620872bc5>

Ntr_0_MeOH_dereplicator

<https://gnps.ucsd.edu/ProteoSAFe/status.jsp?task=084a9bf9e1d44f86bef525c00e0b89c0>

Ntr_10%_MeOH_dereplicator

<https://gnps.ucsd.edu/ProteoSAFe/status.jsp?task=d1c6633a82bd4884977b6c4373c058ea>

Ntr_0_PHT_MeOH_dereplicator

<https://gnps.ucsd.edu/ProteoSAFe/status.jsp?task=00332d296877476399d736079dce19d4>

Ntr_10%_PHT_MeOH_dereplicator

<https://gnps.ucsd.edu/ProteoSAFe/status.jsp?task=9bf4a3c5244d446a9572dc0759c4b653>

***N. salicorniae***

Nsa_0_MeOH_P6_Ajustado_2024 08 01

<https://gnps.ucsd.edu/ProteoSAFe/status.jsp?task=867fa8a49da7416ca4bfc29b0b32b3d3>

Nsa_10%_MeOH_P6 Ajustado_2024 08 01

<https://gnps.ucsd.edu/ProteoSAFe/status.jsp?task=fd49018f87f1414fab651268e1f016ad>

Nsa_0_PHT_MeOH_P6_Ajustado_2024 08 01

<https://gnps.ucsd.edu/ProteoSAFe/status.jsp?task=0ad2ebdc52f343ee90207fb504a47614>

Nsa_10%_PHT_MeOH_P6_Ajustado_2024 08 02

<https://gnps.ucsd.edu/ProteoSAFe/status.jsp?task=f52124d464224674a45eb64a7c0118ee>

Nsa_0_MeOH_moldiscovery

<https://gnps.ucsd.edu/ProteoSAFe/status.jsp?task=c6a69a5da6294ebe8414a20434de5575>

Nsa_10%_MeOH_moldiscovery

<https://gnps.ucsd.edu/ProteoSAFe/status.jsp?task=2f647838746e4783b8dd804aae1dac94>

Nsa_0_PHT_MeOH_moldiscovery

<https://gnps.ucsd.edu/ProteoSAFe/status.jsp?task=69cfa923f9be4e58b2d34697f67e8313>

Nsa_10%_PHT_MeOH_moldiscovery

<https://gnps.ucsd.edu/ProteoSAFe/status.jsp?task=1491d924dde341ccaa4fd32b276f77ac>

Nsa_0_MeOH_dereplicator

<https://gnps.ucsd.edu/ProteoSAFe/status.jsp?task=c8b93c4525e54ea08f32bcb3a50cc938>

Nsa_10%_MeOH_dereplicator

<https://gnps.ucsd.edu/ProteoSAFe/status.jsp?task=05fb597817434644b0bba0aa75ecfd8e>

Nsa_0_PHT_MeOH_dereplicator

<https://gnps.ucsd.edu/ProteoSAFe/status.jsp?task=bea988d44c964158b9c0f19e2be46438>

Nsa_10%_PHT_MeOH_dereplicator

<https://gnps.ucsd.edu/ProteoSAFe/status.jsp?task=00302f4dc9424ced8457ef8ea8de2def>
