# Supplementary material for: Adaptative cellular and metabolomic responses to salinity of black yeasts isolated from deep-sea sediments of the Gulf of Mexico
Source: Research Square preprint supplement (doi:10.21203/rs.3.rs-7032826/v1), 2025-07-21
Supplement: Supplementary file 3 [file fc8da5bf0fe30b2b35051cbc.xlsx]

## Sheet: Table S1. feature classificatio
Table S1. List of features classification assessed by CANOPUS
Chemical Classification using NPClassifier_https://npclassifier.ucsd.edu/
Sth, Salinomyces thailandicus; Ntr, Neophaeotheca triangularis; Nsa, Neophaeotheca salicorniae
NaCl concentrations: 0 and 10%
PHT: phthalide
ID	Species_condition	NPC_pathway	NPC_superclass	NPC_class	Adduct	Retention time (min)	Theoretical mass	Experimental mass	Mass accuracy (ppm)
F1	Sth_0	Alkaloids	Ornithine alkaloids	Polyamines	[M+Na]+	6.7396	678.44	678.441	-1.79841
F2		Alkaloids	Nicotinic acid alkaloids	Pyridine alkaloids	[M+H]+	9.19732	656.516	656.515	1.77403
F3		Alkaloids	Pseudoalkaloids	pteridine alkaloids	[M-H2O-H]-	0.682767	217.049	217.047	5.77797
F4		Amino acids and Peptides	Oligopeptides	Cyclic peptides	[M+H]+	5.43567	692.419	692.416	4.21891
F5		Amino acids and Peptides	Oligopeptides	Lipopeptides	[M+NH4]+	4.70432	756.393	756.396	-3.88122
F6		Amino acids and Peptides	Small peptides	Tripeptides	[M-H2O-H]-	6.79542	548.348	548.345	5.57292
F7		Carbohydrates	Polyols	Cyclitols	[M+H]+	0.671845	261.038	261.037	3.64382
F8		Fatty acids	Fatty amides	N-acyl amines	[M+H]+	4.7843	343.296	343.296	2.20167
F9		Fatty acids	Octadecanoids	Other Octadecanoids	[M+H]+	6.15797	295.228	295.227	2.66161
F10		Fatty acids	Fatty amides	N-acyl amines	[M]+	5.40156	371.329	371.327	4.47141
F11		Fatty acids	Octadecanoids	Other octadecanoids	[M+H]+	6.39314	295.228	295.227	2.48818
F12		Fatty acids	Fatty Acids and Conjugates	Hydroxy fatty acids	[M-H2O-H]-	6.25061	297.244	297.243	1.99096
F13		Fatty acids			[M-H2O-H]-	6.9236	445.298	445.299	-0.683137
F14		Shikimates and Phenylpropanoids	Phenylpropanoids (C6-C3)	Cinnamic acids and derivatives	[M-H2O-H]-	0.683862	291.086	291.087	-1.63251
F15		Terpenoids	Carotenoids (C40)	Carotenoids (C40, γ-Ψ)	[M+NH4]+	6.8128	297.244	297.245	-3.46908
F16	Sth_10%	Alkaloids	Pseudoalkaloids	Terpenoid alkaloids	[M-H2O-H]-	3.15768	596.289	596.286	4.72338
F17		Alkaloids	Ornithine alkaloids	Pyrrolizidine alkaloids	[M+H]+	4.78019	343.299	343.299	0.246497
F18		Alkaloids	Ornithine alkaloids	Polyamines	[M+H-H2O]+	5.516	706.436	706.439	-2.91252
F19		Alkaloids	Tryptophan alkaloids	Simple indole alkaloids	[M+NH4]+	5.75089	311.223	311.223	0.187852
F20		Amino acids and Peptides	Small peptides	Tripeptides	[M+NH4]+	4.32978	473.295	473.294	0.52091
F21		Amino acids and Peptides			[M-H2O-H]-	5.12326	530.281	530.281	0.43543
F22		Fatty acids	Fatty esters	Lactones	[M+H]+	6.47197	295.228	295.227	5.40693
F23		Fatty acids	Fatty Acids and Conjugates	Dicarboxylic acids	[M-H2O-H]-	6.70265	295.228	295.227	3.06983
F24		Fatty acids	Octadecanoids	Other Octadecanoids	[M+H]+	6.77364	297.243	297.242	2.31163
F25		Fatty acids	Spingolipids	Phosphosphingolipids	[M+H-H2O]+	6.9525	864.628	864.632	-4.80134
F26		Fatty acids	Fatty acyls	Oxygenated hydrocarbons	[M-H]-	6.96173	445.298	445.299	-1.85397
F27		Polyketides	Linear polyketides	Acetogenins	[M+H]+	6.32201	459.314	459.314	0.0327184
F28		Terpenoids	Monoterpenoids	Pyridine alkaloids	[M+NH4]+	3.5829	211.135	211.136	-4.31876
F29		Terpenoids	Sesquiterpenoids	Guaiane sesquiterpenoids	[M+H]+	5.04833	339.218	339.217	4.58714
F30		Terpenoids	Diterpenoids	Cembrane diterpenoids	[M+H]+	5.06496	323.223	323.222	4.39684
F31	Sth_0_PHT	Alkaloids	Pseudoalkaloids	Tricyclic guanidine alkaloids	[M-H2O+H]+	3.8209	325.202	325.202	2.16696
F32		Alkaloids	Ornithine alkaloids	Polyamines	[M-H2O-H]-	6.68414	363.217	363.218	-4.0535
F33		Carbohydrates	Saccharides	Disaccharides	[M+H]+	0.656778	325.114	325.113	2.43502
F34		Carbohydrates	Saccharides	Monosaccharides	[M+H]+	0.777087	223.082	223.081	2.59507
F35		Carbohydrates	Nucleosides	Purine nucleosides	[M+H]+	0.79234	284.135	284.135	-2.20678
F36		Carbohydrates	Saccharides	Monosaccharides	[M+H]+	0.802128	221.067	221.066	5.07709
F37		Carbohydrates	Saccharides	Disaccharides	[M+H-H2O]+	0.739686	297.119	297.118	2.87035
F38		Carbohydrates	Saccharides	Disaccharides	[M+H-H2O]+	0.864847	369.14	369.139	2.94839
F39		Carbohydrates	Nucleosides	Purine nucleos(t)ides	[M+H-H2O]+	1.42484	397.136	397.137	-2.60046
F40		Fatty acids	Fatty amides	N-acyl amines	[M+H]+	4.59855	343.297	343.296	4.06303
F41		Fatty acids	Fatty Acids and Conjugates	Unsaturated fatty acids	[M+H]+	5.81069	293.212	293.211	4.05728
F42		Fatty acids			[M+H]+	5.85736	311.223	311.222	4.02914
F43		Fatty acids	Octadecanoids	Other Octadecanoids	[M+H]+	6.59286	297.244	297.242	3.96448
F44		Fatty acids			[M+H]+	6.64559	297.244	297.242	3.64959
F45		Fatty acids	Fatty Acids and Conjugates	Unsaturated fatty acids	[M+H]+	6.67404	279.232	279.232	2.22574
F46		Fatty acids	Fatty Acids and Conjugates	Epoxy fatty acids	[M+H]+	6.97506	371.317	371.316	3.37468
F47		Fatty acids	Eicosanoids	Other Eicosanoids	[M+H]+	7.83978	325.275	325.274	2.5372
F48		Fatty acids	Fatty Acids and Conjugates	Hydroxy fatty acids	[M+H]+	8.57135	355.322	355.321	2.97926
F49		Fatty acids	Fatty Acids and Conjugates	Hydroxy fatty acids	[M+H-H2O]+	7.61256	369.302	369.3	4.30921
F50		Fatty acids	Fatty Acids and Conjugates	Epoxy fatty acids	[M+H-H2O]+	7.91614	279.233	279.232	2.71657
F51		Fatty acids	Glycerolipids	Fatty alcohols	[M+NH4]+	6.84517	426.325	426.325	0.463947
F52		Fatty acids	Octadecanoids	Other Octadecanoids	[M-H]-	5.73115	315.255	315.254	1.36261
F53		Fatty acids	Fatty acids and Conjugates	Heterocyclic fatty acids	[M-H]-	6.60836	295.229	295.228	2.36195
F54		Fatty acids	Fatty Acids and Conjugates	Hydroxy fatty acids	[M-H]-	7.33063	327.292	327.29	3.23369
F55		Fatty acids	Fatty Acids and Conjugates	Hydroxy fatty acids	[M-H]-	7.76452	341.307	341.306	2.34158
F56		Fatty acids	Fatty Acids and Conjugates	Hydroxy fatty acids	[M-H]-	8.06749	355.322	355.322	1.4658
F57		Fatty acids	Fatty Acids and Conjugates	Hydroxy fatty acids	[M-H2O-H]-	6.23165	297.244	297.243	4.13633
F58		Fatty acids	Octadecanoids	Other Octadecanoids	[M-H2O-H]-	6.64325	295.229	295.227	5.10452
F59		Polyketides			[M+H]+	5.38182	325.202	325.201	2.70049
F60		Polyketides	Cyclic polyketides	2-pyrone derivatives	[M+H]+	5.76394	311.223	311.222	4.62196
F61		Polyketides	Linear polyketides	open-chain polyketides	[M+H-H2O]+	6.13161	725.434	725.432	2.62906
F62		Terpenoids	Diterpenoids	Labdane diterpenoids	[M+H]+	7.56484	327.291	327.289	4.4038
F63		Terpenoids	Triterpenoids	Lanostane, Tirucallane and Euphane triterpenoids	[M+H]+	7.78736	473.365	473.363	4.41791
F64		Terpenoids			[M+H]+	8.09301	327.291	327.289	3.5101
F65		Terpenoids	Diterpenoids	Colensane and Clerodane diterpenoids	[M+H]+	8.39404	353.306	353.305	3.13003
F66		Terpenoids	Steroids	Cholestane steroids	[M-H]-	8.28328	461.366	461.364	4.09484
F67	Sth_10%_PHT	Alkaloids	Guanidine alkaloids	Purine alkaloids	[M+H-H2O]+	3.66429	316.213	316.213	0.0639948
F68		Alkaloids	Pseudoalkaloids	Steroidal alkaloids	[M+NH4]+	6.75616	371.317	371.317	1.27029
F69		Alkaloids	Histidine alkaloids	Imidazole alkaloids	[M-H]-	5.43311	415.319	415.319	0.350814
F70		Carbohydrates	Saccharides	Disaccharides	[M+H]+	1.13741	443.177	443.176	2.98567
F71		Carbohydrates	Saccharides	Disaccharides	[M+H]+	0.675157	391.122	391.123	-4.1939
F72		Carbohydrates			[M+H]+	0.851365	307.103	307.102	3.5413
F73		Carbohydrates	Saccharides	Disaccharides	[M+H-H2O]+	0.704763	369.14	369.139	3.34498
F74		Carbohydrates	Saccharides	Disaccharides	[M+H-H2O]+	0.91448	369.14	369.139	2.95489
F75		Carbohydrates	Saccharides	Disaccharides	[M+H-H2O]+	1.13741	471.173	471.171	3.6002
F76		Carbohydrates	Saccharides	Disaccharides	[M+Na]+	0.872528	391.122	391.121	1.98483
F77		Carbohydrates	Saccharides	Disaccharides	[M+Na]+	1.04104	493.154	493.153	2.61168
F78		Carbohydrates	Polyols	Amino cyclitols	[M-H2O-H]-	2.58652	619.357	619.355	3.12873
F79		Fatty acids	Fatty Acids and Conjugates	Unsaturated fatty acids	[M+H]+	5.73464	293.213	293.211	5.01801
F80		Fatty acids			[M+H]+	5.8035	311.223	311.222	5.28964
F81		Fatty acids	Octadecanoids	Other Octadecanoids	[M-2H2O+H]+	6.596	279.233	279.232	1.64415
F82		Fatty acids	Octadecanoids	Other Octadecanoids	[M-H]-	6.38622	293.213	293.212	3.06733
F83		Fatty acids	Fatty Acids and Conjugates	Hydroxy fatty acids	[M-H2O-H]-	7.69707	369.302	369.3	4.30325
F84		Polyketides	Phloroglucinols	Acyl phloroglucinols	[M+H]+	0.576553	347.096	347.097	-4.66089
F85		Terpenoids	Monoterpenoids	Iridoids monoterpenoids	[M+Na]+	1.00983	449.128	449.127	2.5287
F86		Terpenoids	Sesquiterpenoids	Germacrane sesquiterpenoids	[M+H]+	4.39964	269.213	269.211	5.42599
F87	Ntr_0	Alkaloids	Anthranilic acid alkaloids	Phenazine alkaloids	[M+NH4]+	0.95516	233.103	233.103	-3.13565
F88		Amino acids and Peptides	Small peptides	Tripeptides	[M-H]-	2.57555	424.283	424.282	3.09876
F89		Amino acids and Peptides	Small peptides	Tripeptides	[M-H]-	2.6152	438.298	438.297	2.02599
F90		Amino acids and Peptides	Cyclic peptides		[M-H]-	3.47948	466.33	466.329	2.58028
F91		Amino acids and Peptides	Oligopeptides	Cyclic peptides	[M-H]-	4.46034	546.274	546.272	2.42537
F92		Amino acids and Peptides	Oligopeptides	Linear peptides	[M+H]+	5.08229	706.437	706.437	-0.777106
F93		Carbohydrates	Nucleosides	Purine nucleosides	[M+H-H2O]+	0.747178	233.102	233.103	-4.07618
F94		Fatty acids	Glycerolipids	Sphingoid bases	[M+H]+	2.90138	400.255	400.254	2.53073
F95		Fatty acids	Fatty Acids and Conjugates	Oxo fatty acids	[M-H]-	2.91233	243.124	243.124	0.509452
F96		Fatty acids	Glycerophospholipids	Glycerophosphoethanolamines	[M+H-H2O]+	3.27796	466.329	466.329	0.11895
F97		Fatty acids	Octadecanoids	Other Octadecanoids	[M-H]-	3.82804	329.234	329.233	4.54114
F98		Fatty acids	Fatty esters	Lactones	[M-H]-	3.9582	281.176	281.176	2.216
F99		Fatty acids	Fatty acyls	Fatty aldehydes	[M+Na]+	4.65621	343.296	343.297	-2.50134
F100		Fatty acids	Fatty acyls	Fatty aldehydes	[M+Na]+	4.77564	343.299	343.297	4.29946
F101		Fatty acids	Fatty esters	Lactones	[M+H]+	5.25263	295.228	295.227	3.10465
F102		Fatty acids			[M+H]+	5.35924	311.223	311.222	3.16224
F103		Fatty acids	Fatty amides	N-acyl amines	[M]+	5.40373	371.329	371.327	4.6882
F104		Fatty acids	Fatty Acids and Conjugates	Dicarboxylic acids	[M-H]-	5.53929	285.207	285.207	0.480913
F105		Fatty acids	Octadecanoids	Other Octadecanoids	[M+H]+	5.63826	309.208	309.206	5.69689
F106		Fatty acids			[M-H]-	5.73036	309.208	309.207	2.48008
F107		Fatty acids	Fatty acids and Conjugates	Epoxy fatty acids	[M+H-H2O]+	6.09771	279.232	279.232	0.293304
F108		Fatty acids	Fatty Acids and Conjugates	Unsaturated fatty acids	[M+H]+	6.19214	295.228	295.227	2.51257
F109		Fatty acids	Glycerophospholipids	Glycerophosphocholines	[M+H]+	6.2371	496.342	496.34	3.89435
F110		Fatty acids	Glycerophospholipids	Glycerophosphates	[M+H]+	6.2703	409.236	409.235	3.21879
F111		Fatty acids	Eicosanoids		[M+H]+	6.63594	313.238	313.237	3.50722
F112		Fatty acids	Fatty esters	Lactones	[M+H]+	6.66482	279.233	279.232	2.321
F113		Fatty acids	Fatty Acids and Conjugates		[M+H]+	6.74675	371.317	371.316	4.38998
F114		Fatty acids			[M+H]+	7.35995	341.306	341.305	3.52165
F115		Fatty acids	Fatty Acids and Conjugates	Hydroxy fatty acids	[M+H]+	7.70681	355.322	355.321	2.3435
F116		Polyketides	Linear polyketides	Open-chain polyketides	[M+H]+	6.76014	369.302	369.3	4.98519
F117		Terpenoids	Sesquiterpenoids	Aromadendrane sesquiterpenoids	[M+H]+	2.91233	253.145	253.143	4.99785
F118		Terpenoids			[M+NH4]+	3.27796	598.374	598.374	-0.109423
F119		Terpenoids	Triterpenoids	Lupane triterpenoids	[M-H]-	3.436	612.39	612.391	-1.21295
F120		Terpenoids	Diterpenoids	Labdane diterpenoids	[M+H]+	6.10812	323.223	323.222	5.16256
F121		Terpenoids	Diterpenoids	Colensane and Clerodane diterpenoids	[M+H]+	6.77614	353.306	353.305	2.70094
F122		Terpenoids	Diterpenoids	Cembrane diterpenoids	[M+H]+	7.29857	325.275	325.274	2.86923
F123	Ntr_10%	Alkaloids	Nicotinic acid alkaloids	Pyridine alkaloids	[M+H]+	2.40306	245.139	245.14	-1.61187
F124		Amino acids and Peptides	Small peptides	Tripeptides	[M+H-H2O]+	3.28123	610.306	610.308	-3.8658
F125		Amino acids and Peptides	Oligopeptides	Cyclic peptides	[M+H]+	3.95721	738.424	738.423	1.34519
F126		Amino acids and Peptides	Oligopeptides	Linear peptides	[M+H-H2O]+	4.39432	720.417	720.419	-2.60816
F127		Amino acids and Peptides	Oligopeptides	Lipopeptides	[M+K]+	4.70913	756.392	756.394	-3.21231
F128		Amino acids and Peptides	Oligopeptides	Tripeptides	[M+NH4]+	4.73477	756.393	756.396	-3.36958
F129		Amino acids and Peptides	Small peptides	Tripeptides	[M+NH4]+	5.00933	720.414	720.415	-1.42371
F130		Amino acids and Peptides	Oligopeptides	Cyclic peptides	[M+H]+	5.44885	692.418	692.416	2.4112
F131		Amino acids and Peptides	Small peptides	Tripeptides	[M+H]+	5.48923	704.42	704.42	0.299202
F132		Amino acids and Peptides	Oligopeptides	Lipopeptides	[M+H]+	5.55272	706.437	706.439	-2.5471
F133		Carbohydrates	Polyols	Amino cyclitols	[M+H-H2O]+	3.51382	608.326	608.326	0.156995
F134		Fatty acids	Octadecanoids	Other Octadecanoids	M-H	3.80545	329.235	329.233	5.46935
F135		Fatty acids	Fatty esters	Lactones	[M+H]+	4.97025	293.212	293.211	3.37825
F136		Fatty acids	Octadecanoids	Other Octadecanoids	[M-H]-	5.34143	311.224	311.223	2.824
F137		Fatty acids			[M+H]+	6.72035	297.244	297.242	3.96986
F138		Shikimates and Phenylpropanoids			[M+H-H2O]+	3.38448	612.319	612.32	-1.50031
F139		Terpenoids	Diterpenoids	Labdane diterpenoids	[M-H]-	3.13452	596.288	596.287	2.48361
F140		Terpenoids	Steroids	Ergostane steroids	[M+H]+	4.94223	459.313	459.311	4.94033
F141		Terpenoids	Triterpenoids	Ursane and Taraxastane triterpenoids	[M+H]+	5.50203	473.327	473.326	2.47459
F142		Terpenoids	Steroids	Spirostane steroids	[M+H]+	5.71438	473.328	473.326	4.14468
F143		Terpenoids			[M+H]+	5.85028	293.212	293.211	3.43009
F144	Ntr_0_PHT	Alkaloids	Nicotinic acid alkaloids	Pyridine alkaloids	[M-H2O-H]-	0.677103	217.048	217.047	4.86251
F145		Alkaloids	Pseudoalkaloids	Phenylalanine-derived alkaloids	[M+Na]+	0.746043	297.119	297.12	-2.60048
F146		Alkaloids	Pseudoalkaloids	Purine alkaloids	[M+H-H2O]+	0.910408	233.103	233.103	-1.47689
F147		Alkaloids	Pseudoalkaloids	Purine alkaloids	[M+H]+	1.49611	231.124	231.124	-1.61977
F148		Alkaloids	Tetramate alkaloids		[M+H-H2O]+	1.75925	215.129	215.129	-0.222155
F149		Alkaloids	Lysine alkaloids		[M+Na]+	2.01514	446.299	446.299	-0.514212
F150		Alkaloids	Tryptophan alkaloids	Yohimbine-like alkaloids	[M-H2O-H]-	2.2152	272.151	272.152	-5.01817
F151		Alkaloids	Nicotinic acid alkaloids	Pyridine alkaloids	[M+H]+	2.41037	245.139	245.14	-1.42463
F152		Alkaloids	Pseudoalkaloids	Purine alkaloids	[M+H]+	2.73746	241.144	241.145	-1.89684
F153		Alkaloids	Pseudoalkaloids	Purine alkaloids	[M+H-H2O]+	3.26027	247.155	247.155	-1.14802
F154		Alkaloids	Sesquiterpenoids	Benzodiazepine alkaloids	[M+H]+	3.30497	227.129	227.129	-1.58389
F155		Alkaloids	Peptide alkaloids	Simple amide alkaloids	[M+H-H2O]+	3.46474	243.16	243.16	-0.558562
F156		Alkaloids	Pseudoalkaloids	Purine alkaloids	[M-H]-	5.01419	449.233	449.234	-1.88309
F157		Alkaloids	Ornithine alkaloids	Polyamines	[M-H]-	5.14373	307.192	307.19	5.68335
F158		Alkaloids	Pseudoalkaloids	Phenylalanine-derived alkaloids	[M+Na]+	5.28945	319.176	319.178	-5.68992
F159		Alkaloids	Ornithine alkaloids	Polyamines	[M-H]-	5.35779	374.219	374.22	-2.58295
F160		Alkaloids	Histidine alkaloids	Imidazole alkaloids	[M-H]-	5.43287	415.319	415.319	0.081624
F161		Alkaloids	Tryptophan alkaloids	Pyridine alkaloids	[M-H]-	5.4858	417.287	417.287	0.128027
F162		Alkaloids	Nicotinic acid alkaloids	Pyridine alkaloids	[M-H2O-H]-	5.65131	309.208	309.208	1.41038
F163		Amino acids and Peptides	Small peptides	Tripeptides	[M+H-H2O]+	3.42062	484.241	484.24	2.39352
F164		Amino acids and Peptides			[M+H-H2O]+	3.59874	333.192	333.194	-4.58169
F165		Amino acids and Peptides	Small peptides	Tripeptides	[M-H2O-H]-	4.14894	390.215	390.214	1.84821
F166		Amino acids and Peptides	Small peptides	Tripeptides	[M-H]-	4.31969	447.262	447.261	0.96509
F167		Amino acids and Peptides	Oligopeptides	Linear peptides	[M+K]+	5.37562	678.401	678.399	3.21429
F168		Carbohydrates	Nucleosides	Purine nucleotides	[M+H-H2O]+	0.699099	305.064	305.065	-1.42137
F169		Carbohydrates	Saccharides	Monosaccharides	[M+H]+	0.76696	221.067	221.066	4.78352
F170		Carbohydrates	Saccharides	Disaccharides	[M+H-H2O]+	0.798953	369.14	369.139	2.92617
F171		Carbohydrates	Saccharides		[M+H]+	0.851693	295.104	295.102	5.06277
F172		Carbohydrates	Saccharides	Monosaccharides	[M+H]+	0.883803	325.114	325.113	2.98929
F173		Carbohydrates	Saccharides	Disaccharides	[M+H-H2O]+	0.910408	369.14	369.139	3.41948
F174		Fatty acids	Glycerophospholipids	Glycerophosphocholines	[M+H]+	1.32436	428.206	428.204	4.26757
F175		Fatty acids	Fatty Acids and Conjugates	Dicarboxylic acids	[M-H]-	1.99338	229.108	229.108	0.61117
F176		Fatty acids	Fatty Acids and Conjugates	Dicarboxylic acids	[M-H]-	2.26069	217.109	217.108	1.63017
F177		Fatty acids	Fatty Acids and Conjugates	Hydroxy fatty acids	[M-H]-	2.44234	261.135	261.134	5.86707
F178		Fatty acids	Fatty Acids and Conjugates	Oxo fatty acids	[M-H]-	2.66838	243.124	243.124	2.32087
F179		Fatty acids	Fatty esters	Lactones	[M+H]+	2.92271	203.129	203.128	5.38251
F180		Fatty acids	Fatty Acids and Conjugates	Dicarboxylic acids	[M-H]-	2.96576	229.109	229.108	2.10697
F181		Fatty acids	Fatty Acids and Conjugates	Oxo fatty acids	[M+H]+	3.03023	215.129	215.128	4.66904
F182		Fatty acids	Fatty Acids and Conjugates	Dicarboxylic acids	M-H	3.09597	201.113	201.113	3.72924
F183		Fatty acids	Fatty Acids and Conjugates	Dicarboxylic acids	[M+H-H2O]+	3.33202	209.118	209.117	4.90146
F184		Fatty acids	Fatty Acids and Conjugates	Dicarboxylic acids	[M-H]-	3.36006	225.114	225.113	3.04887
F185		Fatty acids	Fatty Acids and Conjugates	Dicarboxylic acids	[M-H]-	3.40464	213.114	213.113	2.77243
F186		Fatty acids	Fatty Acids and Conjugates		[M+H]+	3.56017	241.145	241.143	4.54242
F187		Fatty acids	Fatty Acids and Conjugates	Dicarboxylic acids	[M+H]+	3.63917	203.129	203.128	4.51164
F188		Fatty acids	Fatty Acids and Conjugates	Epoxy fatty acids	[M+H]+	3.84352	295.228	295.227	4.48697
F189		Fatty acids	Fatty Acids and Conjugates	Hydroxy fatty acids	[M+H]+	3.84783	345.229	345.227	4.96759
F190		Fatty acids	Fatty Acids and Conjugates	Dicarboxylic acids	[M-H]-	3.84783	401.255	401.254	2.06039
F191		Fatty acids	Octadecanoids	Other Octadecanoids	[M+H]+	3.86368	313.238	313.237	3.28471
F192		Fatty acids	Fatty Acids and Conjugates	Dicarboxylic acids	[M+H]+	3.86368	403.271	403.269	3.97362
F193		Fatty acids	Fatty acyl glycosides	Fatty acyl glycosides of mono- and disaccharides	[M-H]-	3.8899	447.261	447.26	2.98962
F194		Fatty acids	Fatty amides	N-acyl amines	[M-H2O-H]-	3.90481	431.23	431.229	1.83127
F195		Fatty acids	Fatty acyl glycosides	Rhamnolipids	[M-H]-	4.06291	475.293	475.291	4.20354
F196		Fatty acids	Eicosanoids	Thromboxanes	[M-H]-	4.10624	431.267	431.265	4.03755
F197		Fatty acids	Fatty Acids and Conjugates	Hydroxy fatty acids	[M+H-H2O]+	4.13888	211.134	211.133	4.34189
F198		Fatty acids	Octadecanoids	Other Octadecanoids	[M+H-H2O]+	4.14564	293.212	293.211	3.57523
F199		Fatty acids	Fatty Acids and Conjugates	Dicarboxylic acids	[M-H]-	4.14894	227.129	227.129	0.658128
F200		Fatty acids	Octadecanoids	Jasmonic acids	[M-H]-	4.19172	209.118	209.118	-0.164672
F201		Fatty acids	Fatty Acids and Conjugates	Dicarboxylic acids	[M+Na]+	4.26677	453.248	453.246	3.57691
F202		Fatty acids	Eicosanoids	Prostaglandins	[M+H]+	4.2769	371.245	371.243	6.29797
F203		Fatty acids	Glycerolipids	Monoacylglycerols	[M-H2O-H]-	4.2769	385.26	385.259	3.64195
F204		Fatty acids	Octadecanoids	Other Octadecanoids	[M+H]+	4.34079	293.212	293.211	3.77864
F205		Fatty acids	Fatty Acids and Conjugates	Dicarboxylic acids	[M+H]+	4.3948	389.255	389.253	3.91288
F206		Fatty acids	Octadecanoids	Other Octadecanoids	[M+H]+	4.64036	389.291	389.29	3.9184
F207		Fatty acids	Fatty acyl glycosides	Fatty acyl glycosides of mono- and disaccharides	[M-H]-	4.71152	433.283	433.281	4.81509
F208		Fatty acids	Octadecanoids	Other Octadecanoids	[M-H]-	4.71227	313.239	313.238	2.9678
F209		Fatty acids	Fatty Acids and Conjugates	Epoxy fatty acids	[M+H]+	4.73841	297.244	297.243	2.86196
F210		Fatty acids	Octadecanoids	Other Octadecanoids	[M-H]-	4.75763	313.24	313.238	3.48817
F211		Fatty acids	Sphingolipids	Sphingoid bases	[M+H-H2O]+	4.78742	434.277	434.275	4.75238
F212		Fatty acids	Octadecanoids	Other Octadecanoids	[M-H]-	4.79814	387.277	387.275	4.62821
F213		Fatty acids	Fatty esters	Lactones	[M+H]+	4.94382	211.134	211.133	4.13465
F214		Fatty acids	Octadecanoids	Other Octadecanoids	[M+H]+	4.97907	313.239	313.237	6.08862
F215		Fatty acids	Fatty Acids and Conjugates	Oxo fatty acids	[M+H]+	5.03036	399.276	399.274	3.85364
F216		Fatty acids	Fatty Acids and Conjugates	Dicarboxylic acids	[M+H]+	5.1651	417.286	417.285	3.87882
F217		Fatty acids	Fatty Acids and Conjugates	Dicarboxylic acids	[M-H]-	5.18683	271.193	271.191	4.03338
F218		Fatty acids	Fatty esters	Fatty acid estolides	[M+H-H2O]+	5.20297	343.213	343.212	5.03936
F219		Fatty acids	Octadecanoids	Other Octadecanoids	[M+H]+	5.26985	313.239	313.237	4.98245
F220		Fatty acids	Fatty Acids and Conjugates	Hydroxy fatty acids	[M+H]+	5.31929	311.223	311.222	4.64895
F221		Fatty acids	Fatty Acids and Conjugates	Heterocyclic fatty acids	[M+H]+	5.3369	295.228	295.227	3.53076
F222		Fatty acids	Fatty Acids and Conjugates	Hydroxy fatty acids	[M+Na]+	5.34799	349.197	349.199	-5.526
F223		Fatty acids	Octadecanoids	Other Octadecanoids	[M+H]+	5.35538	311.223	311.222	4.24217
F224		Fatty acids	Fatty esters	Lactones	[M+H]+	5.37385	343.213	343.212	4.45414
F225		Fatty acids	Fatty amides	N-acyl amines	[M]+	5.42137	371.328	371.327	2.45299
F226		Fatty acids	Eicosanoids	Hepoxilins	[M+H]+	5.45874	355.249	355.248	3.70053
F227		Fatty acids	Glycerophospholipids	Oxidized glycerophospholipids	[M+H]+	5.46213	692.416	692.413	4.42677
F228		Fatty acids	Octadecanoids	Other Octadecanoids	[M-H]-	5.4858	315.255	315.254	1.98337
F229		Fatty acids	Octadecanoids	Other Octadecanoids	[M-H]-	5.52138	315.255	315.254	1.77561
F230		Fatty acids	Fatty Acids and Conjugates	Unsaturated fatty acids	[M+H]+	5.54391	281.249	281.248	3.8661
F231		Fatty acids	Octadecanoids	Other Octadecanoids	[M-H]-	5.61329	357.266	357.265	3.10913
F232		Fatty acids	Fatty Acids and Conjugates	Hydroxy fatty acids	[M-H]-	5.65124	315.255	315.254	1.8086
F233		Fatty acids	Eicosanoids	Thromboxanes	[M+H]+	5.65676	343.213	343.212	5.50334
F234		Fatty acids	Octadecanoids	Other Octadecanoids	[M-H]-	5.69432	315.255	315.254	2.10899
F235		Polyketides	Chromanes	Azaphilones	[M+H]+	2.69473	301.166	301.165	4.01046
F236		Polyketides			[M+H]+	3.8899	359.209	359.206	6.1243
F237		Polyketides	Linear polyketides	Open-chain polyketides	[M+H]+	4.53585	357.229	357.227	6.32578
F238		Polyketides	Cyclic polyketides	Monacolins and Monacolin derivatives	[M+H]+	4.78742	339.218	339.217	4.57741
F239		Polyketides	Linear polyketides	Open-chain polyketides	[M+H]+	4.88506	341.234	341.232	6.29414
F240		Polyketides	Macrolides	Macrolide lactones	[M+H]+	4.92762	329.198	329.196	6.35449
F241		Polyketides	Linear polyketides	Open-chain polyketides	[M+H]+	5.40014	413.255	413.253	4.66735
F242		Polyketides	Cyclic polyketides	Monacolins and Monacolin derivatives	[M+H]+	5.52786	307.192	307.19	6.3914
F243		Shikimates and Phenylpropanoids	Xanthones		[M+H]+	0.746043	407.096	407.097	-2.64305
F244		Shikimates and Phenylpropanoids			[M+H]+	2.23138	241.145	241.143	4.48229
F245		Shikimates and Phenylpropanoids	Coumarins	Simple coumarins	[M+H]+	2.6253	265.108	265.107	4.31932
F246		Shikimates and Phenylpropanoids	Coumarins	Simple coumarins	[M+H]+	2.8241	265.108	265.107	4.46153
F247		Terpenoids	Apocarotenoids	Apocarotenoids (β-)	[M+H]+	3.02495	301.166	301.165	4.42982
F248		Terpenoids	Pseudoalkaloids	Terpenoid alkaloids	[M-H2O-H]-	3.15365	596.287	596.286	1.14207
F249		Terpenoids	Apocarotenoids	Apocarotenoids (β-)	[M+H]+	3.22562	229.145	229.143	4.89857
F250		Terpenoids	Diterpenoids		[M+H]+	3.70452	387.239	387.238	4.54234
F251		Terpenoids	Diterpenoids		[M+H]+	3.83804	385.26	385.258	3.79673
F252		Terpenoids	Sesquiterpenoids		[M+H]+	4.14894	395.206	395.206	-0.119937
F253		Terpenoids	Sesquiterpenoids		[M+H]+	4.33007	325.203	325.204	-3.06785
F254		Terpenoids	Monoterpenoids		[M+H]+	4.46321	327.182	327.18	4.95274
F255		Terpenoids	Steroids	Ergostane steroids	[M+H]+	4.87063	443.317	443.316	3.87776
F256		Terpenoids	Steroids	Ergostane steroids	[M+H]+	4.96823	459.312	459.311	3.69521
F257		Terpenoids	Sesquiterpenoids	Caryophyllane sesquiterpenoids	[M+H]+	5.00393	339.218	339.217	3.78854
F258		Terpenoids	Diterpenoids	Norlabdane diterpenoids	[M+H]+	5.13345	309.207	309.206	3.6617
F259		Terpenoids	Sesquiterpenoids	Germacrane sesquiterpenoids	[M+H]+	5.26301	281.212	281.211	3.68919
F260		Terpenoids	Diterpenoids	Cembrane diterpenoids	[M+H]+	5.26301	355.249	355.248	3.73854
F261		Terpenoids	Sesquiterpenoids	Cyclofarnesane sesquiterpenoids	[M+H]+	5.50167	401.291	401.29	3.88272
F262	Ntr_10%_PHT	Alkaloids	Pseudoalkaloids	Purine alkaloids	[M+H-H2O]+	1.50164	231.124	231.124	-1.0073
F263		Alkaloids	Tetramate alkaloids		[M+H-H2O]+	1.73096	215.129	215.129	-0.812499
F264		Alkaloids	Anthranilic acid alkaloids	Phenazine alkaloids	[M+H]+	2.44663	251.056	251.056	-0.838585
F265		Alkaloids	Histidine alkaloids	Imidazole alkaloids	[M-H]-	2.71206	225.114	225.115	-4.58723
F266		Alkaloids	Histidine alkaloids	Imidazole alkaloids	[M+H-H2O]+	2.76353	215.129	215.129	-0.983559
F267		Alkaloids	Pseudoalkaloids	Imidazole alkaloids	[M-H2O-H]-	2.80145	247.156	247.156	-1.25629
F268		Alkaloids	Pseudoalkaloids	Purine alkaloids	[M+H]+	3.03997	283.155	283.155	-0.987784
F269		Alkaloids	Pseudoalkaloids	Purine alkaloids	[M+Na]+	3.17362	297.132	297.132	-0.174051
F270		Alkaloids	Lysine alkaloids	Piperidine alkaloids	[M-H]-	4.12892	390.215	390.215	0.478434
F271		Alkaloids	Lysine alkaloids	Piperidine alkaloids	[M+Na]+	5.05906	534.275	534.276	-2.91643
F272		Alkaloids	Lysine alkaloids	Piperidine alkaloids	[M+Na]+	5.62655	580.41	580.408	2.16409
F273		Alkaloids	Peptide alkaloids	Tetramate alkaloids	[M-H2O-H]-	5.81254	309.208	309.208	0.687563
F274		Alkaloids	Ornithine alkaloids		[M+H-H2O]+	6.83168	435.252	435.254	-3.03427
F275		Amino acids and Peptides	Small peptides	Aminoacids	[M-H2O-H]-	2.16788	239.09	239.089	4.1386
F276		Amino acids and Peptides	Small peptides	Tripeptides	[M-H2O-H]-	2.58072	397.186	397.186	-0.915189
F277		Amino acids and Peptides			[M+H-H2O]+	3.5765	333.192	333.194	-4.77317
F278		Amino acids and Peptides	Small peptides	Tripeptides	[M+H-H2O]+	4.24715	453.247	453.246	4.02807
F279		Carbohydrates	Saccharides	Disaccharides	[M+Na]+	0.57646	347.096	347.095	2.47125
F280		Carbohydrates	Saccharides	Disaccharides	[M+H-H2O]+	0.675087	369.14	369.139	2.57455
F281		Carbohydrates	Saccharides	Monosaccharides	[M-H2O-H]-	0.684672	251.078	251.077	3.66381
F282		Carbohydrates	Saccharides	Disaccharides	[M+Na]+	0.830743	391.122	391.121	2.285
F283		Carbohydrates	Saccharides	Disaccharides	[M+Na]+	0.830743	421.133	421.132	2.49405
F284		Carbohydrates	Saccharides	Disaccharides	[M+H-H2O]+	0.914345	369.14	369.139	3.16646
F285		Carbohydrates	Saccharides	Disaccharides	[M+H]+	1.16732	443.177	443.176	3.4259
F286		Carbohydrates	Saccharides	Disaccharides	[M+Na]+	1.21036	493.154	493.153	2.79479
F287		Carbohydrates	Saccharides	Disaccharides	[M+Na]+	2.08944	493.155	493.153	3.84232
F288		Carbohydrates	Nucleosides	Purine nucleotides	[M+H-H2O]+	2.14199	289.033	289.033	-1.09739
F289		Fatty acids	Fatty Acids and Conjugates	Dicarboxylic acids	[M-H]-	0.956236	203.092	203.092	-0.266933
F290		Fatty acids	Fatty Acids and Conjugates	Dicarboxylic acids	[M-H]-	1.23835	203.093	203.092	0.703068
F291		Fatty acids	Fatty Acids and Conjugates	Dicarboxylic acids	[M-H]-	2.16788	217.108	217.108	1.16543
F292		Fatty acids	Fatty Acids and Conjugates	Dicarboxylic acids	[M+H]+	2.20401	219.124	219.123	5.25741
F293		Fatty acids	Glycerophospholipids	Glycerophosphoethanolamines	[M-H2O-H]-	2.21478	333.157	333.158	-3.44552
F294		Fatty acids	Fatty Acids and Conjugates	Dicarboxylic acids	[M-H]-	2.35517	229.109	229.108	2.11962
F295		Fatty acids	Fatty acyls	Lactones	[M+H]+	2.7305	215.129	215.128	4.97676
F296		Fatty acids	Glycerophospholipids	Glycerophosphoethanolamines	[M+Na]+	2.77223	319.177	319.176	2.46967
F297		Fatty acids	Fatty Acids and Conjugates		[M+H]+	2.90823	227.129	227.128	3.85616
F298		Fatty acids	Fatty Acids and Conjugates	Dicarboxylic acids	[M-H]-	2.9349	229.108	229.108	1.42519
F299		Fatty acids	Fatty Acids and Conjugates	Dicarboxylic acids	[M-H2O-H]-	2.97889	213.113	213.113	3.0153
F300		Fatty acids	Fatty Acids and Conjugates	Hydroxy fatty acids	[M-H]-	2.97739	261.135	261.134	1.62292
F301		Fatty acids	Eicosanoids	Thromboxanes	[M+H]+	3.15728	341.198	341.196	5.88715
F302		Fatty acids	Fatty acyl glycosides	Fatty acyl glycosides of mono- and disaccharides	[M+Na]+	3.36938	471.259	471.256	4.66207
F303		Fatty acids	Fatty Acids and Conjugates	Dicarboxylic acids	[M-H2O-H]-	3.42548	213.113	213.113	3.42494
F304		Fatty acids	Fatty amides	Primary amides	[M+H-H2O]+	3.44603	316.214	316.215	-3.19997
F305		Fatty acids	Glycerolipids	Monoacylglycerols	[M+H-H2O]+	3.63833	361.223	361.222	3.82227
F306		Fatty acids	Fatty Acids and Conjugates	Dicarboxylic acids	[M+H]+	3.66578	203.129	203.128	4.08876
F307		Fatty acids	Octadecanoids	Other Octadecanoids	[M-H]-	3.78359	329.235	329.233	4.07703
F308		Fatty acids	Fatty Acids and Conjugates	Dicarboxylic acids	[M+H-H2O]+	3.84204	213.149	213.149	3.55103
F309		Fatty acids	Fatty Acids and Conjugates	Dicarboxylic acids	[M-H]-	3.86811	401.255	401.254	1.54476
F310		Fatty acids	Octadecanoids	Other Octadecanoids	[M+H]+	3.88412	313.238	313.237	3.24991
F311		Fatty acids	Eicosanoids	Thromboxanes	[M-H]-	3.91045	431.266	431.265	3.03191
F312		Fatty acids	Fatty esters	Lactones	[M+H]+	3.92647	295.228	295.227	3.73942
F313		Fatty acids	Fatty Acids and Conjugates	Dicarboxylic acids	[M+H]+	3.9696	415.271	415.269	3.78968
F314		Fatty acids	Octadecanoids	Other Octadecanoids	[M+H]+	4.03041	329.234	329.232	4.74579
F315		Fatty acids	Fatty Acids and Conjugates	Hydroxy fatty acids	[M+H-H2O]+	4.11884	211.134	211.133	4.38262
F316		Fatty acids	Octadecanoids	Other Octadecanoids	[M+H]+	4.11884	311.223	311.222	4.01436
F317		Fatty acids	Fatty Acids and Conjugates	Dicarboxylic acids	[M-H]-	4.12892	227.129	227.129	0.227536
F318		Fatty acids	Fatty Acids and Conjugates	Dicarboxylic acids	[M-H]-	4.12892	401.219	401.218	3.25122
F319		Fatty acids	Eicosanoids	Thromboxanes	[M-H]-	4.12892	431.266	431.265	3.06252
F320		Fatty acids	Octadecanoids	Other Octadecanoids	[M+H]+	4.18736	311.223	311.222	3.56613
F321		Fatty acids	Fatty Acids and Conjugates	Unsaturated fatty acids	[M+H]+	4.27834	293.212	293.211	3.55014
F322		Fatty acids	Fatty Acids and Conjugates	Unsaturated fatty acids	[M+H]+	4.33272	211.134	211.133	4.31889
F323		Fatty acids	Fatty Acids and Conjugates	Nitro fatty acids	[M+H]+	4.33272	344.245	344.243	4.15212
F324		Fatty acids	Octadecanoids	Other Octadecanoids	[M-H]-	4.38721	343.25	343.249	3.82271
F325		Fatty acids	Fatty Acids and Conjugates	Dicarboxylic acids	[M-H]-	4.43114	433.246	433.245	3.04509
F326		Fatty acids			[M+Na]+	4.55373	439.232	439.23	4.42702
F327		Fatty acids	Fatty Acids and Conjugates	Hydroxy fatty acids	[M+H-H2O]+	4.81223	339.218	339.217	3.89896
F328		Fatty acids	Eicosanoids	Thromboxanes	[M-H]-	4.86615	499.33	499.328	4.46539
F329		Fatty acids	Fatty acyls		[M+H]+	4.94129	373.26	373.258	3.74653
F330		Fatty acids	Glycerolipids	Monoacylglycerols	[M-H2O-H]-	4.99437	387.24	387.243	-6.19977
F331		Fatty acids	Fatty Acids and Conjugates	Oxo fatty acids	[M+H]+	5.01567	399.276	399.274	3.98963
F332		Fatty acids	Octadecanoids	12-oxophytodienoic acid metabolites	[M+H]+	5.02694	325.239	325.237	3.74216
F333		Fatty acids	Fatty esters	Lactones	[M+H]+	5.1559	291.197	291.195	3.78167
F334		Fatty acids	Glycerolipids	Glycosylmonoacylglycerols	[M-H2O-H]-	5.29488	497.314	497.311	4.90998
F335		Fatty acids	Fatty Acids and Conjugates	Unsaturated fatty acids	[M+H]+	5.35364	295.228	295.227	3.56335
F336		Fatty acids	Fatty Acids and Conjugates	Hydroxy fatty acids	[M+H-H2O]+	5.39584	213.149	213.149	3.93647
F337		Fatty acids	Octadecanoids	Other Octadecanoids	[M-H]-	5.42247	269.213	269.212	1.80333
F338		Fatty acids	Octadecanoids	Other Octadecanoids	[M-H]-	5.54365	315.255	315.254	2.60351
F339		Fatty acids	Fatty Acids and Conjugates	Oxo fatty acids	[M-H]-	5.63652	269.213	269.212	2.78471
F340		Fatty acids	Fatty esters	Lactones	[M+H]+	5.71228	293.212	293.211	3.09484
F341		Fatty acids	Fatty acyl glycosides	Sophorolipids	[M-H2O-H]-	5.72221	513.345	513.343	4.42003
F342		Fatty acids	Fatty Acids and Conjugates	Dicarboxylic acids	[M-H2O-H]-	5.80599	267.197	267.196	4.74593
F343		Fatty acids	Glycerolipids	Monoacylglycerols	[M-H]-	5.80599	387.276	387.275	3.1169
F344		Fatty acids	Fatty Acids and Conjugates	Epoxy fatty acids	[M+H]+	5.83919	269.212	269.211	3.68685
F345		Fatty acids	Glycerolipids	Monoacylglycerols	[M+H]+	5.92458	355.286	355.284	3.86676
F346		Fatty acids	Fatty Acids and Conjugates	Unsaturated fatty acids	[M+H]+	6.21335	295.228	295.227	4.7925
F347		Fatty acids	Glycerolipids	Monoacylglycerols	[M+H]+	6.21957	371.281	371.279	3.85095
F348		Fatty acids	Fatty Acids and Conjugates	Hydroxy fatty acids	[M-H2O-H]-	6.23007	297.244	297.243	4.41724
F349		Fatty acids	Fatty Acids and Conjugates	Branched fatty acids	[M+K]+	6.34791	365.21	365.209	4.16262
F350		Fatty acids	Fatty Acids and Conjugates	Unsaturated fatty acids	[M+H]+	6.39037	281.249	281.248	3.61935
F351		Fatty acids	Octadecanoids	Other Octadecanoids	[M-H]-	6.62428	295.229	295.228	3.42723
F352		Fatty acids	Fatty Acids and Conjugates	Epoxy fatty acids	[M+H-H2O]+	6.64415	279.233	279.232	3.10299
F353		Fatty acids	Glycerolipids	Monoacylglycerols	[M+H]+	6.76003	371.281	371.279	3.67023
F354		Fatty acids			[M+H]+	6.81605	297.243	297.242	3.52511
F355		Fatty acids	Fatty Acids and Conjugates	Oxo fatty acids	[M-H]-	7.08232	269.213	269.212	3.10527
F356		Fatty acids	Fatty Acids and Conjugates	Hydroxy fatty acids	[M-H]-	7.12439	271.228	271.228	1.27316
F357		Fatty acids	Fatty Acids and Conjugates	Epoxy fatty acids	[M+H]+	7.12605	297.244	297.242	5.81682
F358		Fatty acids	Glycerolipids	Monoacylglycerols	[M+H-H2O]+	7.2459	399.276	399.274	4.3111
F359		Fatty acids	Fatty Acids and Conjugates	Methoxy fatty acids	[M+H]+	7.51181	311.259	311.258	4.53882
F360		Fatty acids	Octadecanoids	Other Octadecanoids	[M-2H2O+H]+	7.55714	279.233	279.232	4.51558
F361		Fatty acids	Fatty Acids and Conjugates	Branched fatty acids	[M-H]-	7.69694	369.302	369.301	2.6303
F362		Fatty acids	Glycerolipids	Monoacylglycerols	[M+H-H2O]+	7.71574	311.259	311.258	3.7249
F363		Fatty acids	Octadecanoids	Other Octadecanoids	[M+H]+	7.81227	293.212	293.211	3.88096
F364		Polyketides	Cyclic polyketides	2-pyrone derivatives	[M+H]+	1.54668	213.113	213.112	4.7027
F365		Polyketides			[M+H]+	2.88141	299.15	299.149	3.675
F366		Polyketides	Linear polyketides	Open-chain polyketides	[M+H]+	3.82633	397.222	397.222	-0.584973
F367		Polyketides			[M+H-H2O]+	3.94305	397.259	397.258	2.34905
F368		Polyketides	Macrolides	Macrolide lactones	[M+H]+	4.24715	329.234	329.232	3.86011
F369		Polyketides	Linear polyketides	Open-chain polyketides	[M+H]+	5.32781	343.213	343.212	3.91687
F370		Terpenoids	Monoterpenoids	Acyclic monoterpenoids	[M+H]+	1.31738	203.129	203.128	4.3354
F371		Terpenoids	Sesquiterpenoids	Bisabolane sesquiterpenoids	[M+H]+	2.73378	301.166	301.165	3.61898
F372		Terpenoids	Monoterpenoids	Acyclic monoterpenoids	[M+H]+	2.89198	317.161	317.159	5.88751
F373		Terpenoids	Triterpenoids	Dammarane and Protostane triterpenoids	[M+H]+	3.86811	681.459	681.457	1.8988
F374		Terpenoids	Sesquiterpenoids	Eremophilane sesquiterpenoids	[M+H]+	4.17145	209.118	209.117	4.83233
F375		Terpenoids	Diterpenoids	Norpimarane and Norisopimarane diterpenoids	[M+H]+	4.17145	395.206	395.206	-0.433698
F376		Terpenoids	Diterpenoids	Norlabdane diterpenoids	[M+H]+	4.40899	269.212	269.211	5.04042
F377		Terpenoids	Sesquiterpenoids	Caryophyllane sesquiterpenoids	[M+H]+	5.11227	339.218	339.217	3.73371
F378		Terpenoids	Sesquiterpenoids	Germacrane sesquiterpenoids	[M+H]+	5.24191	281.212	281.211	3.48792
F379		Terpenoids	Steroids	Ergostane steroids	[M+H]+	6.30437	459.312	459.311	3.94733
F380		Terpenoids	Diterpenoids	Norlabdane diterpenoids	[M+H]+	6.70748	341.27	341.269	3.3014
F381		Terpenoids	Steroids	Cholane steroids	[M-H]-	6.90821	445.296	445.296	-0.245554
F382		Terpenoids	Meroterpenoids	Triketide meroterpenoids	[M+H]+	6.94179	429.302	429.3	4.29264
F383		Terpenoids	Steroids	Cholestane steroids	[M-H]-	7.03934	465.323	465.322	1.02339
F384		Terpenoids	Steroids	Ecdysteroids	[M+H-H2O]+	7.14744	459.312	459.311	3.80158
F385		Terpenoids	Diterpenoids	Labdane diterpenoids	[M+H]+	7.2459	325.275	325.274	3.98305
F386		Terpenoids	Diterpenoids	Cembrane diterpenoids	[M+H]+	7.8699	325.275	325.274	3.79337
F387	Nsa_0	Alkaloids	Ornithine alkaloids	Polyamines	[M+H-H2O]+	4.93125	404.302	404.302	0.0739371
F388		Alkaloids	Pseudoalkaloids	Carboline alkaloids	[M+NH4]+	4.24986	323.186	323.187	-1.50619
F389		Alkaloids	Ornithine alkaloids		[M+NH4]+	4.70138	311.186	311.186	0.567128
F390		Amino acids and Peptides	Small peptides	Tripeptides	[M-H2O-H]-	2.5682	424.283	424.281	4.80424
F391		Carbohydrates	Nucleosides	Purine nucleosides	[M+Na]+	0.75088	292.103	292.102	5.22865
F392		Fatty acids	Glycerophospholipids	Glycerophosphoglycerols	[M+H]+	0.660999	247.058	247.058	1.79275
F393		Fatty acids	Fatty amides	N-acyl amines	[M+H]+	5.41114	371.328	371.327	4.20154
F394		Fatty acids	Glycerophospholipids	Glycerophosphoethanolamines	[M+H-H2O]+	2.84734	452.313	452.314	-0.312349
F395		Fatty acids			[M+H-H2O]+	5.17843	291.197	291.196	3.06738
F396		Fatty acids	Octadecanoids	Other Octadecanoids	[M-H]-	3.87314	329.234	329.233	3.24737
F397		Fatty acids	Octadecanoids	Other Octadecanoids	[M+H]+	4.55243	295.228	295.227	4.80554
F398		Fatty acids	Octadecanoids	Other Octadecanoids	[M+H]+	5.07052	325.202	325.201	3.38681
F399		Fatty acids	Fatty esters	Lactones	[M+H]+	5.4471	295.228	295.227	3.08829
F400		Fatty acids	Octadecanoids	Other Octadecanoids	[M-H]-	4.13024	327.219	327.218	3.00598
F401		Fatty acids	Glycerolipids	Monoacylglycerols	[M+H]+	6.01608	355.285	355.284	1.83095
F402		Fatty acids	Fatty Acids and Conjugates	Epoxy fatty acids	[M+H-H2O]+	6.14706	279.233	279.232	0.489523
F403		Fatty acids	Octadecanoids	Other Octadecanoids	[M-H]-	5.63593	313.239	313.238	0.952015
F404		Fatty acids	Octadecanoids	Other Octadecanoids	[M-H]-	5.6378	309.208	309.207	2.17186
F405		Fatty acids	Glycerophospholipids	Glycerophosphoethanolamines	[M-H]-	6.15735	452.279	452.278	2.15592
F406		Fatty acids	Octadecanoids	Other Octadecanoids	[M-2H2O+H]+	6.6288	279.233	279.232	2.44394
F407		Fatty acids			[M+H]+	6.67231	297.243	297.242	2.25796
F408		Fatty acids	Fatty Acids and Conjugates	Epoxy fatty acids	[M+H-H2O]+	6.8266	279.233	279.232	4.05309
F409		Fatty acids	Fatty Acids and Conjugates	Hydroxy fatty acids	[M-H2O-H]-	4.68635	313.239	313.238	3.99032
F410		Fatty acids	Fatty esters	Lactones	[M-H2O-H]-	6.4197	365.231	365.233	-3.77572
F411		Fatty acids	Octadecanoids	Other Octadecanoids	[M-H2O-H]-	6.46335	297.244	297.243	3.60172
F412		Terpenoids	Sesquiterpenoids		[M+H]+	3.76098	267.16	267.159	3.33346
F413		Terpenoids	Sesquiterpenoids	Guaiane sesquiterpenoids	[M+H]+	4.63236	249.149	249.149	2.11665
F414		Terpenoids	Sesquiterpenoids	Germacrane sesquiterpenoids	[M+H]+	4.65857	267.16	267.159	1.90367
F415		Terpenoids	Diterpenoids	Phytane diterpenoids	[M+H]+	5.25891	367.249	367.248	3.17855
F416		Terpenoids	Monoterpenoids		[M+H]+	5.66854	249.149	249.149	2.86269
F417		Terpenoids	Steroids	Pregnane steroids	[M-H2O-H]-	5.98225	363.216	363.217	-3.00179
F418	Nsa_10%	Fatty acids	Fatty amides	N-acyl amines	[M+H]+	4.59004	343.297	343.296	2.89203
F419		Fatty acids	Fatty amides	N-acyl amines	[M]+	5.40303	371.328	371.327	2.57633
F420		Fatty acids	Fatty Acids and Conjugates	Hydroxy fatty acids	[M-H]-	5.72008	315.255	315.254	2.33896
F421		Fatty acids	Octadecanoids	Other Octadecanoids	[M-H]-	6.49725	295.229	295.228	4.96365
F422		Fatty acids	Octadecanoids	Other Octadecanoids	[M+H]+	6.59727	297.243	297.242	3.57591
F423		Fatty acids			[M+H]+	6.6547	297.243	297.242	3.35858
F424		Fatty acids	Octadecanoids	Other Octadecanoids	[M+H]+	6.69175	297.243	297.242	3.30307
F425		Fatty acids	Fatty Acids and Conjugates	Hydroxy fatty acids	[M-H2O-H]-	4.72505	313.239	313.238	2.78797
F426		Fatty acids	Octadecanoids	Other Octadecanoids	[M-H2O-H]-	5.02311	313.239	313.238	3.90915
F427		Terpenoids	Monoterpenoids		[M+H]+	1.09684	211.134	211.133	3.38252
F428		Terpenoids	Triterpenoids	Lupane triterpenoids	[M-H]-	6.88077	664.425	664.422	4.54419
F429	Nsa_0_PHT	Alkaloids	Tryptophan alkaloids	Quinoline alkaloids	[M-H2O-H]-	3.6182	321.039	321.039	0.910481
F430		Alkaloids	Tryptophan alkaloids	Simple indole alkaloids	[M+NH4]+	4.28201	313.239	313.239	0.0456521
F431		Alkaloids	Ornithine alkaloids	Polyamines	[M+H]+	4.69367	343.297	343.296	4.18449
F432		Alkaloids	Pseudoalkaloids	Quinolizidine alkaloids	[M+NH4]+	4.82682	343.297	343.299	-4.72763
F433		Alkaloids	Tryptophan alkaloids	Carboline alkaloids	[M+H-H2O]+	5.35727	311.223	311.223	-0.585355
F434		Alkaloids	Lysine alkaloids	Piperidine alkaloids	[M+H-H2O]+	6.21269	371.317	371.317	0.858673
F435		Alkaloids	Nicotinic acid alkaloids	Pyridine alkaloids	[M+H]+	6.74296	371.317	371.317	-0.329411
F436		Alkaloids	Lysine alkaloids	Piperidine alkaloids	[M+NH4]+	7.02573	342.273	342.275	-4.94512
F437		Amino acids and Peptides	Small peptides		[M+Na]+	1.32874	206.975	206.976	-3.85185
F438		Fatty acids	Fatty Acids and Conjugates	Dicarboxylic acids	[M-H]-	3.61028	215.129	215.129	1.01604
F439		Fatty acids	Fatty amides	N-acyl amines	[M+H]+	4.62467	343.297	343.296	3.31295
F440		Fatty acids	Fatty amides	N-acyl amines	[M+H-H2O]+	4.65065	343.297	343.296	3.26184
F441		Fatty acids	Fatty Acids and Conjugates	Epoxy fatty acids	[M+H-H2O]+	4.68742	279.233	279.232	5.8702
F442		Fatty acids	Octadecanoids	Other Octadecanoids	[M-H]-	4.98513	313.239	313.238	2.27217
F443		Fatty acids	Eicosanoids	Other Eicosanoids	[M+H]+	5.09529	327.254	327.253	3.75681
F444		Fatty acids	Octadecanoids	Other Octadecanoids	[M-H]-	5.15403	311.223	311.223	2.19391
F445		Fatty acids	Fatty esters	Lactones	[M+H]+	5.17617	295.228	295.227	4.34979
F446		Fatty acids	Fatty amides	N-acyl amines	[M+H-H2O]+	5.44794	371.328	371.327	2.70691
F447		Fatty acids	Fatty Acids and Conjugates	Hydroxy fatty acids	[M-H]-	5.4958	315.255	315.254	1.87552
F448		Fatty acids	Fatty amides	N-acyl amines	[M+H]+	5.50746	371.328	371.327	3.52975
F449		Fatty acids	Octadecanoids	Other Octadecanoids	[M+H-H2O]+	5.64542	313.239	313.237	4.9357
F450		Fatty acids			[M+H]+	5.84013	311.223	311.222	3.96263
F451		Fatty acids	Fatty esters	Lactones	[M+H]+	5.84639	293.212	293.211	3.62892
F452		Fatty acids	Octadecanoids	Other Octadecanoids	[M+H]+	5.87799	311.223	311.222	3.35663
F453		Fatty acids	Glycerolipids	Monoacylglycerols	[M+H]+	6.23638	371.28	371.279	2.91743
F454		Fatty acids	Octadecanoids	Other Octadecanoids	[M+H]+	6.47895	295.228	295.227	2.99017
F455		Fatty acids			[M+H]+	6.57706	297.244	297.242	3.86153
F456		Fatty acids	Octadecanoids	Other Octadecanoids	[M+H]+	6.65345	297.243	297.242	3.53218
F457		Fatty acids	Fatty Acids and Conjugates	Unsaturated fatty acids	[M+H-H2O]+	6.68553	279.233	279.232	3.25877
F458		Fatty acids	Fatty Acids and Conjugates	Dicarboxylic acids	[M-H]-	6.70692	369.302	369.301	2.93656
F459		Fatty acids	Fatty Acids and Conjugates	Hydroxy fatty acids	[M+H]+	7.00612	371.317	371.316	2.93059
F460		Fatty acids	Fatty acids and Conjugates	Carbocyclic fatty acids	[M+H]+	7.55684	295.228	295.227	4.33353
F461		Fatty acids	Glycerolipids	Monoacylglycerols	[M+H]+	7.59124	369.301	369.3	4.07564
F462		Fatty acids	Fatty Acids and Conjugates	Hydroxy fatty acids	[M-H2O-H]-	7.70555	369.302	369.3	3.83264
F463		Fatty acids	Fatty Acids and Conjugates	Dicarboxylic acids	[M+H-H2O]+	7.90211	353.306	353.305	2.76903
F464		Fatty acids	Fatty Acids and Conjugates	Hydroxy fatty acids	[M+H]+	8.24704	369.338	369.336	3.31223
F465		Shikimates and Phenylpropanoids	Phenolic acids (C6-C1)	Simple phenolic acids	[M+H]+	9.38656	461.364	461.363	2.37987
F466		Terpenoids	Sesquiterpenoids	Guaiane sesquiterpenoids	[M-H2O-H]-	4.02805	333.136	333.137	-3.68198
F467		Terpenoids			[M+H]+	7.25919	399.275	399.274	2.66048
F468		Terpenoids	Diterpenoids	Labdane diterpenoids	[M-H]-	7.26997	323.26	323.259	1.91916
F469		Terpenoids	Diterpenoids	Cembrane diterpenoids	[M+H]+	7.86859	325.275	325.274	2.84402
F470		Terpenoids	Diterpenoids	Colensane and Clerodane diterpenoids	[M+H]+	8.29725	397.333	397.331	3.59123
F471		Terpenoids	Diterpenoids	Colensane and Clerodane diterpenoids	[M+H]+	8.38649	353.306	353.305	2.75387
F472	Nsa_10%_PHT	Alkaloids	Nicotinic acid alkaloids	Pyridine alkaloids	[M+H]+	2.44517	245.14	245.14	-0.734814
F473		Alkaloids	Pseudoalkaloids	Purine alkaloids	[M+H]+	2.72983	215.129	215.129	-0.842509
F474		Alkaloids	Pseudoalkaloids	Purine alkaloids	[M+H]+	3.48904	418.246	418.245	2.22388
F475		Alkaloids	Monoterpenoids	Acetate-derived alkaloids	[M+Na]+	3.60025	211.134	211.133	3.86057
F476		Alkaloids	Histidine alkaloids	Imidazole alkaloids	[M-H2O-H]-	6.34601	443.351	443.351	-2.22217
F477		Amino acids and Peptides	Small peptides	Tripeptides	[M-H2O-H]-	2.60815	438.299	438.297	4.82776
F478		Amino acids and Peptides	Small peptides	Tripeptides	[M+H-H2O]+	3.75407	418.246	418.245	2.57572
F479		Carbohydrates	Saccharides	Disaccharides	[M+Na]+	0.573687	347.096	347.095	2.67926
F480		Carbohydrates	Saccharides	Disaccharides	[M+H-H2O]+	0.703125	369.14	369.139	2.86359
F481		Carbohydrates	Saccharides	Monosaccharides	[M+H]+	0.828496	325.114	325.113	3.07357
F482		Carbohydrates	Saccharides	Disaccharides	[M+H-H2O]+	0.913037	369.14	369.139	3.49777
F483		Carbohydrates	Saccharides	Disaccharides	[M+Na]+	1.00897	449.128	449.127	2.74178
F484		Carbohydrates	Saccharides	Disaccharides	[M+Na]+	1.04047	493.154	493.153	3.10584
F485		Carbohydrates	Saccharides	Disaccharides	[M+H]+	1.17022	471.173	471.171	3.84076
F486		Fatty acids	Fatty amides	Primary amides	[M+H-H2O]+	3.66955	316.213	316.215	-4.61104
F487		Fatty acids			[M+H]+	5.36154	415.319	415.321	-3.81298
F488		Fatty acids			[M+H]+	5.36449	311.223	311.222	5.11678
F489		Fatty acids	Octadecanoids	Other Octadecanoids	[M-H]-	5.3753	309.208	309.207	3.27889
F490		Fatty acids	Octadecanoids	Other Octadecanoids	[M-H]-	5.51173	315.255	315.254	2.70501
F491		Fatty acids	Octadecanoids	Other Octadecanoids	[M-H]-	5.65102	313.239	313.238	2.65207
F492		Fatty acids	Glycerolipids	Monoacylglycerols	[M+H]+	6.24232	371.281	371.279	4.51002
F493		Fatty acids	Octadecanoids	Other Octadecanoids	[M-H2O-H]-	6.29922	311.223	311.222	4.04597
F494		Fatty acids	Octadecanoids	Other Octadecanoids	[M+H-H2O]+	6.51025	297.244	297.242	4.22405
F495		Fatty acids	Octadecanoids	Other Octadecanoids	[M+H]+	6.55345	297.243	297.242	3.16278
F496		Fatty acids	Eicosanoids	Hydroxy-hydroperoxyeicosatrienoic acids	[M-H]-	6.56397	371.281	371.28	2.67942
F497		Fatty acids			[M+H]+	6.6575	297.244	297.242	3.67011
F498		Fatty acids	Fatty Acids and Conjugates	Heterocyclic fatty acids	[M-H]-	6.72405	295.229	295.228	3.39403
F499		Fatty acids	Octadecanoids	Other Octadecanoids	[M+H]+	6.74433	297.243	297.242	3.07901
F500		Fatty acids	Fatty Acids and Conjugates	Hydroxy fatty acids	[M-H2O-H]-	7.74345	369.302	369.3	4.69642
F501		Shikimates and Phenylpropanoids	Phenolic acids (C6-C1)	Simple phenolic acids	[M-H]-	1.02902	239.056	239.056	-1.02195
F502		Shikimates and Phenylpropanoids	Phenylethanoids (C6-C2)	Phenylethanoids	[M-H2O-H]-	3.12887	253.072	253.071	2.90668
F503		Terpenoids	Sesquiterpenoids		[M-H2O-H]-	5.79265	309.208	309.21	-4.17162
